# Supplementary material for: Drug-loading colloidal gels assembled from polymeric nanoparticles as an anti-inflammatory platform
Source: Royal Society of Chemistry journal article supplement (doi:10.1039/d1nj02179f), 2021-01-01
Supplement: d1nj02179f1.pdf [file d1nj02179f1.pdf]

## Drug-loading colloidal gels assembled from polymeric nanoparticles as an anti-inflammatory platform

Jinkun Yin<sup>a†</sup>, Yaoqing Chu<sup>a†</sup>, Si-Jian Pan<sup>b\*</sup>, Lianjiang Tan<sup>a\*</sup>

<sup>a</sup> School of Materials Science and Engineering, Shanghai Institute of Technology, Shanghai 201418, China.

<sup>b</sup> Department of Neurosurgery, Ruijin Hospital, Shanghai Jiao Tong University School of Medicine, Shanghai 200025, China.

\*Corresponding author. Email: psj11629@rjh.com.cn; tanlijiang@126.com.

†The authors contributed equally to this work.

### Supporting information

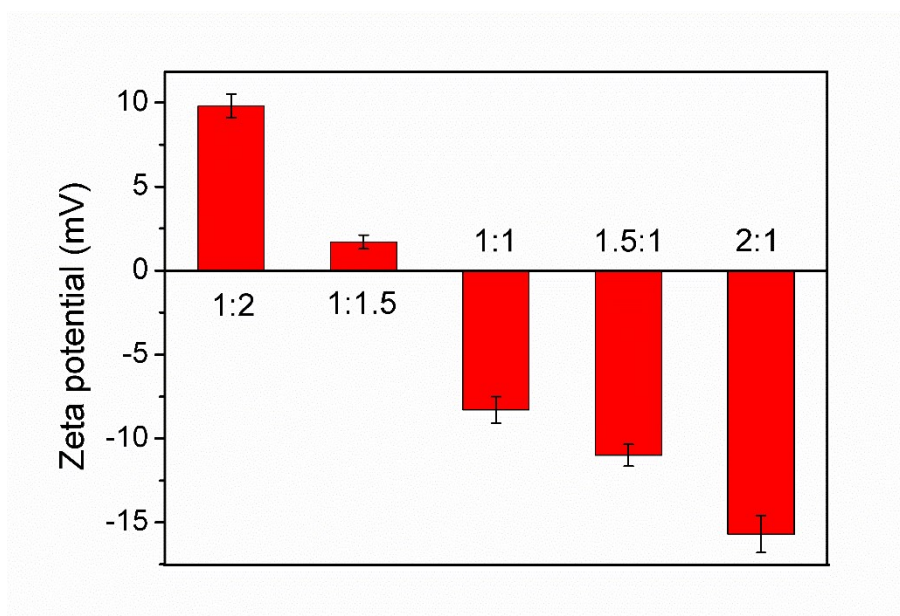

Fig. S1. Zeta potential of C-gels at different ratios of CS to PEG-PLA.

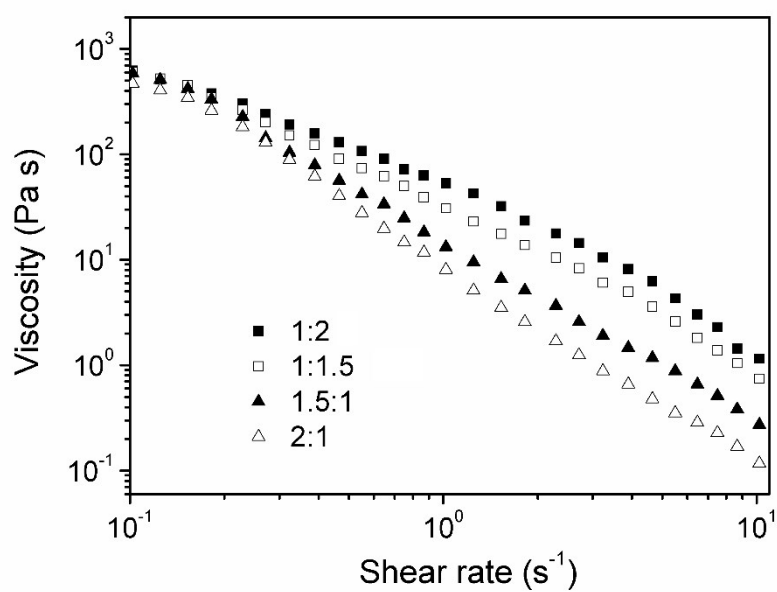

**Fig. S2.** Apparent viscosity versus shear rate of C-gels with different ratios of PEG-PLA to CS.

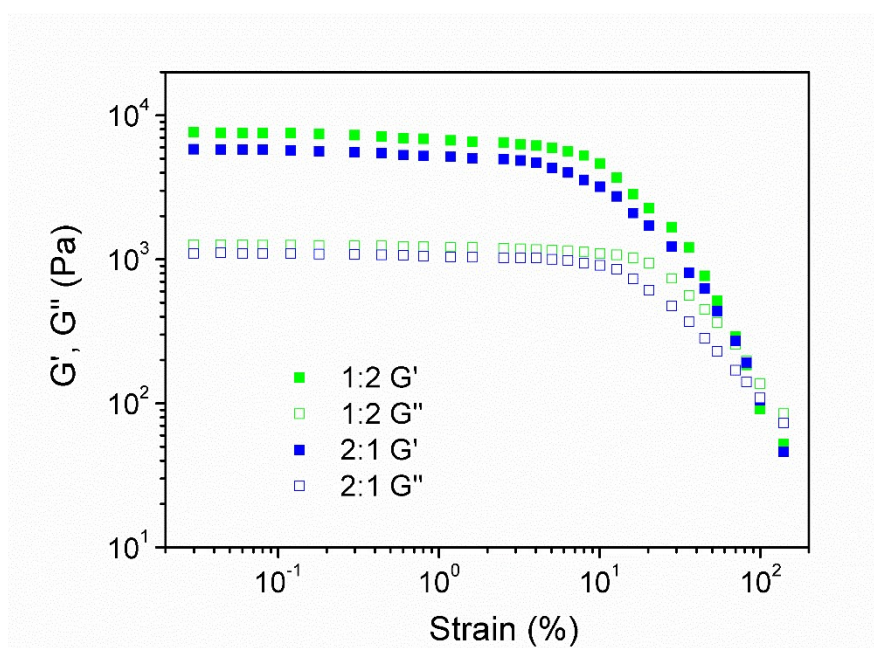

**Fig. S3.** Dynamic moduli versus applied strain of C-gels with different ratios of PEG-PLA to CS.

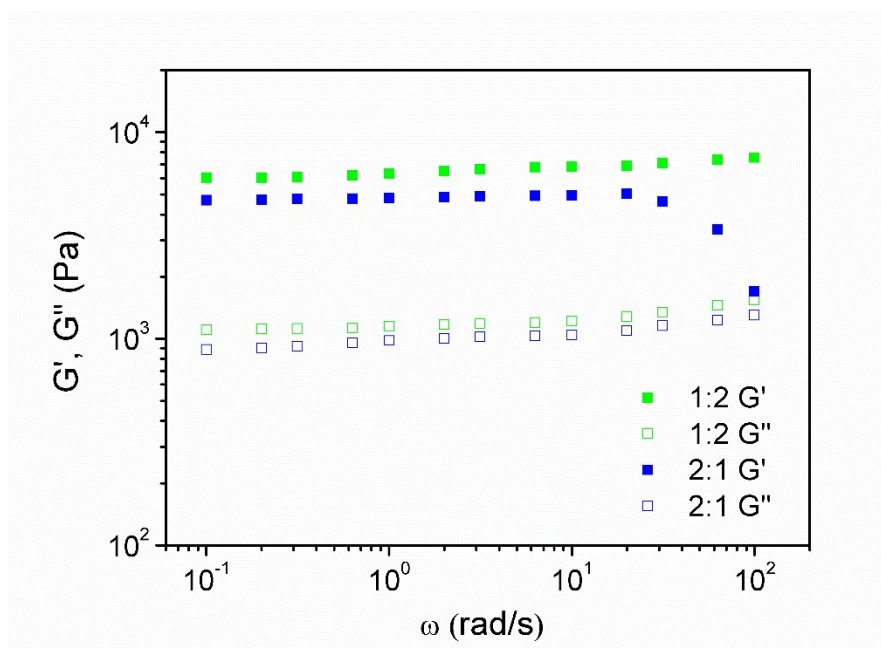

**Fig. S4.** Dynamic moduli versus angular frequency of C-gels with different ratios of PEG-PLA to CS.
